# Supplementary material for: The global burden of HIV-1 drug resistance in the past 20 years
Source: PeerJ. 2018 May 25;6:e4848. doi: 10.7717/peerj.4848 (PMC5971836; doi:10.7717/peerj.4848)
Supplement: Supplemental Information 1 — List of Genbank accession numbers used in the analysis. [file peerj-06-4848-s001.xlsx]

## Sheet: Sheet1
LosAlamos_accession_pool	LosAlamos_seqID	seqID_filtered	Stanford_RT	Stanford_PR
EU861977	1	1	AB078680	AB020911
KY658703	2	3	AB078681	AB020912
AF193276	3	4	AB078683	AB020913
KY658691	4	5	AB078684	AB020914
EF363123	5	6	AB078685	AB020915
KY658714	6	8	AB078687	AB020916
EF363122	7	9	AB078689	AB020917
KY658686	8	10	AB078690	AB020918
AB289589	9	12	AB078691	AB020919
KY658695	10	13	AB078692	AB020920
AB289590	11	14	AB078693	AB020921
KY658697	12	15	AB078694	AB020922
EF420987	13	16	AB078695	AB020923
KY658694	14	17	AB078696	AB020924
EF363127	15	18	AB078697	AB020925
KY658690	16	19	AB078698	AB078688
EF363126	17	20	AB078699	AB078694
KY658685	18	22	AB078700	AB078703
AB286862	19	23	AB078701	AB078704
FM877777	20	24	AB078703	AB078705
EF363125	21	25	AB078704	AB078706
FM877779	22	26	AB078705	AB078707
EF363124	23	27	AB078706	AB078708
FM877778	24	28	AB078707	AB078709
EF036527	25	30	AB078708	AB078710
FM877782	26	31	AB078709	AB078711
AB289588	27	32	AB078710	AB078713
FM877783	28	33	AB078711	AB078715
AB289587	29	36	AB078712	AB078716
AB480298	30	37	AB078713	AB081151
EF469243	31	38	AB078714	AB081152
FM877781	32	39	AB078715	AB081153
AB286849	33	42	AB078716	AB081154
AB480299	34	45	AB081176	AB081155
AB286850	35	46	AB081177	AB081156
GU647197	36	47	AB081178	AB081157
AB286858	37	48	AB081179	AB081158
AB480300	38	52	AB081180	AB081159
AB286859	39	54	AB081181	AB081160
AB480301	40	55	AB081182	AB081161
AB286861	41	59	AB081183	AB081162
AB480692	42	61	AB081184	AB081163
AB286860	43	63	AB081185	AB081164
AB480693	44	65	AB081186	AB081165
AB286851	45	70	AB081187	AB081166
AB485658	46	72	AB081188	AB081167
AB286855	47	73	AB081189	AB081168
AB480698	48	74	AB081190	AB081169
AB286857	49	75	AB081191	AB081170
AB485659	50	76	AB081192	AB081171
AB286856	51	78	AB081193	AB081172
GU733713	52	79	AB081194	AB081173
AB286852	53	80	AB081195	AB081174
GU111555	54	82	AB081196	AB081175
AB286854	55	84	AB081197	AB090997
GU177863	56	85	AB081198	AB090998
AB286853	57	86	AB081199	AB090999
GU647198	58	88	AB081200	AB187525
AB286864	59	91	AB081201	AB187526
GU647196	60	92	AB081202	AB187528
AB287366	61	93	AB081203	AB187529
GU733717	62	94	AB090997	AB187530
AB287370	63	95	AB090998	AB187531
GU733716	64	96	AB090999	AB187532
AB287372	65	97	AB213667	AB187533
GU733715	66	99	AB213668	AB187534
AB287371	67	100	AB213669	AB187535
GU733714	68	101	AB213670	AB187536
AB287367	69	102	AB213671	AB187537
KC156217	70	103	AB213672	AB187538
AB287369	71	104	AB213673	AB187539
KC156215	72	105	AB213674	AB187540
AB287368	73	106	AB213675	AB187541
KC156213	74	108	AB213676	AB187542
AB287003	75	109	AB213677	AB187543
KC156129	76	110	AB213678	AB187544
AB287363	77	113	AB213679	AB187545
AB731668	78	114	AB213680	AB187546
AB287365	79	116	AB213681	AB187547
KC156221	80	118	AB213682	AB187548
AB287364	81	120	AB213683	AB187549
KC156219	82	123	AB213684	AB187550
AB287004	83	124	AB213685	AB187551
AB731664	84	126	AB213686	AB187552
AB286956	85	136	AB213687	AB187553
AB731666	86	137	AB213688	AB187555
AB286955	87	143	AB213689	AB187556
KC156211	88	144	AB213690	AB187557
AB286863	89	151	AB213691	AB187558
KC156216	90	152	AB213692	AB187559
AJ288981	91	153	AB231893	AB187560
KC156220	92	154	AB231895	AB187561
DQ859178	93	155	AB231896	AB187562
KC156218	94	157	AB231898	AB187563
DQ859179	95	158	AB285752	AB213667
KC156210	96	159	AB285753	AB213668
DQ859180	97	161	AB285754	AB213669
KC156214	98	162	AB285755	AB213670
AJ302646	99	163	AB285756	AB213671
KC156212	100	164	AB285757	AB213672
AJ302647	101	165	AB285758	AB213673
KC156130	102	166	AB285759	AB213674
AJ291719	103	167	AB285760	AB213675
KC156120	104	169	AB285761	AB213676
AJ291718	105	171	AB285762	AB213677
KC156128	106	173	AB285763	AB213678
AJ291720	107	175	AB285764	AB213679
AB746342	108	176	AB285765	AB213680
AB254149	109	177	AB285766	AB213681
KC156122	110	178	AB285767	AB213682
AB231893	111	179	AB285768	AB213683
KC156126	112	180	AB285769	AB213684
AB231897	113	181	AB285770	AB213685
KC156124	114	182	AB285771	AB213686
AB231898	115	183	AB285772	AB213687
KC156114	116	184	AB285773	AB213688
AB231894	117	185	AB285774	AB213689
KC156118	118	186	AB285775	AB213690
AB231896	119	188	AB285776	AB213691
KC156116	120	189	AB285777	AB213692
AB231895	121	190	AB285778	AB231893
KC156117	122	191	AB285779	AB231894
AB254150	123	192	AB285780	AB231895
KC156125	124	194	AB285781	AB231896
AB254155	125	195	AB285782	AB231897
KC156127	126	196	AB285783	AB231898
AB254156	127	197	AB285784	AB285752
KC156119	128	199	AB285785	AB285753
AB254151	129	201	AB285786	AB285754
KC156123	130	203	AB285787	AB285755
AB254154	131	204	AB285788	AB285756
KC156121	132	205	AB285789	AB285757
AB254152	133	206	AB285790	AB285758
KC156115	134	207	AB285791	AB285759
AB254142	135	208	AB285792	AB285760
AB746344	136	209	AB285793	AB285761
AB254146	137	210	AB285794	AB285762
AB746343	138	211	AB285795	AB285763
AB254148	139	213	AB285796	AB285764
AB746345	140	214	AB285797	AB285765
AB254147	141	217	AB285798	AB285766
AB731667	142	219	AB285799	AB285767
AB254143	143	220	AB285800	AB285768
AB731670	144	222	AB285801	AB285769
AB254145	145	223	AB285803	AB285770
AB731663	146	224	AB285804	AB285771
AB254144	147	231	AB285805	AB285772
AB731665	148	233	AB285806	AB285773
AB254141	149	235	AB285807	AB285774
AB731669	150	236	AB285808	AB285775
AB253656	151	237	AB285809	AB285776
KC492738	152	238	AB285810	AB285777
AM851091	153	239	AB285811	AB285778
KC899081	154	241	AB285812	AB285779
EF057102	155	242	AB285813	AB285780
KC492737	156	243	AB285814	AB285781
EU448296	157	244	AB285816	AB285784
KF766542	158	245	AB285817	AB285785
EU448295	159	246	AB285818	AB285787
KF766541	160	247	AB285819	AB285788
DQ837381	161	248	AB285820	AB285789
KF766540	162	250	AB285821	AB285790
DQ990880	163	252	AB285822	AB285791
KF766539	164	253	AB285823	AB285792
EF036536	165	254	AB285824	AB285793
KC914396	166	255	AB285825	AB285794
EF036535	167	256	AB285826	AB285795
KC503855	168	257	AB285827	AB285796
EF036534	169	259	AB285828	AB285797
KC503854	170	261	AB285829	AB285798
EF036533	171	263	AB285830	AB285799
KF766538	172	264	AB285831	AB285800
EF036532	173	265	AB285832	AB285801
KF766537	174	266	AB285833	AB285802
EF036531	175	267	AB285834	AB285803
KC899079	176	269	AB285835	AB285804
EF036530	177	270	AB285836	AB285805
KC899080	178	271	AB285837	AB285806
EF036529	179	272	AB285838	AB285807
KC911635	180	273	AB285839	AB285808
EF036528	181	275	AB285840	AB285809
JX112869	182	276	AB285841	AB285810
EF178350	183	277	AB285842	AB285811
HM215251	184	278	AB285843	AB285812
AB221126	185	279	AB356098	AB285813
HM215250	186	280	AB356103	AB285814
AB221125	187	281	AB356105	AB285815
HM215249	188	282	AB356106	AB285816
KF234628	189	283	AB356107	AB285817
KT152842	190	284	AB356109	AB285818
KP170487	191	285	AB356111	AB285819
KT152840	192	287	AB356112	AB285820
AF321523	193	288	AB356114	AB285821
KF990608	194	289	AB356118	AB285822
AF411965	195	290	AB356119	AB285823
KF990607	196	291	AB356120	AB285824
AY531116	197	292	AB356121	AB285825
KF990606	198	293	AB356122	AB285826
AY228556	199	294	AB356124	AB285827
KF990605	200	295	AB356125	AB285828
AY228557	201	296	AB356126	AB285829
AB254153	202	297	AB356127	AB285830
AF538303	203	298	AB356128	AB285831
JN944948	204	300	AB356129	AB285832
AF538302	205	301	AB356130	AB285833
JN944946	206	302	AB356131	AB285834
AF411967	207	303	AB356132	AB285835
JN944944	208	304	AB356133	AB285836
AF411966	209	306	AB356134	AB285837
JN944940	210	307	AB356135	AB285838
AY162224	211	308	AB356136	AB285839
JN944938	212	309	AB356137	AB285840
AF411964	213	310	AB356138	AB285841
JN944936	214	312	AB356139	AB285842
AX455929	215	313	AB356140	AB285843
JN944930	216	315	AB356141	AB356098
AX455917	217	316	AB356142	AB356103
JN944947	218	317	AB356143	AB356105
AF064699	219	318	AB356144	AB356106
JN944943	220	319	AB356145	AB356107
AB052867	221	320	AB356146	AB356111
JN944941	222	321	AB356147	AB356112
AF290027	223	322	AB356148	AB356114
JN944939	224	324	AB356149	AB356118
AF290028	225	325	AB356150	AB356119
JN944917	226	326	AB356151	AB356120
AF290029	227	327	AB356152	AB356121
JN944911	228	328	AB356153	AB356122
AF290030	229	329	AB356154	AB356124
JN944909	230	330	AB356155	AB356125
AF119819	231	331	AB356156	AB356126
JN944907	232	332	AB356157	AB356127
AF414006	233	333	AB356158	AB356128
JN944905	234	334	AB356159	AB356129
EU293448	235	335	AB356160	AB356130
JN944897	236	336	AB356161	AB356131
EU293445	237	337	AB356162	AB356132
JF719818	238	338	AB356163	AB356133
EU293449	239	340	AB356164	AB356134
JF719819	240	342	AB356165	AB356135
EU293444	241	343	AB356166	AB356136
KU641402	242	347	AB356167	AB356137
EU293450	243	350	AB356168	AB356138
KU168302	244	351	AB356169	AB356139
EU293447	245	353	AB356170	AB356140
KU168305	246	354	AB356171	AB356141
EU293446	247	355	AB356172	AB356142
KU168297	248	357	AB356173	AB356143
BD437615	249	359	AB356174	AB356144
KU168308	250	360	AB356175	AB356145
BD437626	251	361	AB356176	AB356146
KU168310	252	362	AB356177	AB356147
AM000055	253	363	AB356178	AB356148
KU168304	254	364	AB356179	AB356149
AM000053	255	366	AB356180	AB356150
KU168301	256	368	AB356181	AB356151
AB049811	257	369	AB356182	AB356152
KU168257	258	370	AB356183	AB356153
AB097869	259	371	AB356184	AB356154
KU168298	260	372	AB356185	AB356155
AB097872	261	373	AB356186	AB356156
KU168259	262	374	AB356187	AB356157
AB097868	263	376	AB356188	AB356158
KU168309	264	377	AB356189	AB356159
DQ083238	265	379	AB356190	AB356160
KU168256	266	380	AB356191	AB356161
AY835772	267	381	AB356192	AB356162
KU168275	268	382	AB356193	AB356163
AY835753	269	383	AB356194	AB356164
KU168306	270	384	AB356195	AB356165
AF385934	271	385	AB356196	AB356166
KU168289	272	386	AB356197	AB356167
AF385936	273	387	AB356198	AB356168
KU168258	274	388	AB356199	AB356169
AF385935	275	389	AB356200	AB356170
KU168261	276	390	AB356201	AB356171
AJ866558	277	392	AB356202	AB356172
KU168296	278	393	AB356203	AB356173
AJ866557	279	394	AB356204	AB356174
KU168277	280	395	AB356205	AB356175
AJ866556	281	396	AB356206	AB356176
KU168299	282	397	AB356207	AB356177
AJ866554	283	398	AB356208	AB356178
KU168282	284	399	AB356209	AB356179
AJ866553	285	400	AB356210	AB356180
KU168266	286	401	AB356211	AB356181
DQ007903	287	402	AB356212	AB356182
KU168273	288	403	AB356213	AB356183
DQ007902	289	404	AB356214	AB356184
KU168272	290	405	AB356215	AB356185
DQ007901	291	406	AB356216	AB356186
KU168283	292	407	AB356217	AB356187
AF413987	293	408	AB356218	AB356188
KU168274	294	409	AB356219	AB356189
AY970950	295	410	AB356220	AB356190
KU168295	296	411	AB356221	AB356191
AJ508597	297	412	AB356222	AB356192
KU168294	298	413	AB356223	AB356193
AJ508596	299	414	AB356224	AB356194
KU168292	300	415	AB356225	AB356195
AJ508595	301	419	AB356226	AB356196
KU168271	302	420	AB356227	AB356197
AB480048	303	422	AB356228	AB356200
KU168284	304	424	AB356229	AB356201
AB480047	305	426	AB356230	AB356202
KU749405	306	427	AB356231	AB356203
JX236676	307	428	AB356232	AB356204
AB480046	308	429	AB356233	AB356205
KU749404	309	430	AB356234	AB356206
JX236674	310	432	AB356235	AB356207
AB480045	311	433	AB356236	AB356208
KU749403	312	434	AB356237	AB356209
JX236672	313	435	AB356238	AB356210
AB480044	314	436	AB356239	AB356211
KU749402	315	444	AB356240	AB356212
JX236670	316	445	AB356241	AB356213
AJ237565	317	446	AB356242	AB356214
KY112585	318	447	AB356243	AB356215
JX236668	319	448	AB356244	AB356216
AY162225	320	449	AB356245	AB356217
KY392778	321	450	AB356246	AB356218
JX236673	322	451	AB356247	AB356219
AY162223	323	452	AB356248	AB356220
KY392777	324	453	AB356249	AB356221
JX236671	325	454	AB356250	AB356222
AY445524	326	455	AB356251	AB356223
KY392771	327	456	AB356252	AB356226
JX236679	328	457	AB356253	AB356227
KY392770	329	458	AB356254	AB356228
JX236675	330	460	AB356255	AB356229
KU749406	331	462	AB356256	AB356230
JX236678	332	463	AB356257	AB356231
KY392767	333	464	AB356258	AB356232
JX236677	334	465	AB356259	AB356233
KY392769	335	466	AB356260	AB356234
JX236669	336	467	AB356261	AB356235
KY392768	337	468	AB356262	AB356236
AB773884	338	469	AB356263	AB356237
AB773885	339	470	AB356264	AB356238
KY392780	340	471	AB356265	AB356239
EF178386	341	473	AB356266	AB356240
KY392776	342	474	AB356267	AB356241
AB480694	343	475	AB356268	AB356242
KU168262	344	476	AB356269	AB356243
AB480695	345	477	AB356270	AB356244
KU168263	346	478	AB356271	AB356245
AB480696	347	479	AB356272	AB356246
KU168264	348	480	AB356273	AB356247
AB480697	349	481	AB356274	AB356248
KU168300	350	482	AB356275	AB356249
KU168307	351	483	AB356276	AB356250
KU168270	352	484	AB356277	AB356251
KU168286	353	485	AB356278	AB356252
KU168280	354	486	AB356279	AB356253
AY271690	355	487	AB356280	AB356254
KU168267	356	488	AB356281	AB356255
KY392772	357	492	AB356282	AB356256
KU168260	358	493	AB356283	AB356257
KU168303	359	494	AB356284	AB356258
KP178420	360	497	AB356285	AB356259
KY392779	361	498	AB356286	AB356260
KU168265	362	499	AB356287	AB356261
AJ866555	363	500	AB356288	AB356262
AJ300450	364	501	AB356289	AB356263
EF178356	365	502	AB356290	AB356264
DQ314731	366	503	AB356291	AB356265
EF178377	367	504	AB356292	AB356266
KY658712	368	507	AB356293	AB356267
KY658681	369	508	AB356294	AB356268
KY658693	370	509	AB356295	AB356269
KY392775	371	510	AB356296	AB356270
HM215252	372	512	AB356297	AB356271
KY658692	373	513	AB356298	AB356272
AF084936	374	514	AB356299	AB356273
JN944942	375	515	AB356300	AB356274
AB845349	376	516	AB356301	AB356275
HM067749	377	517	AB356302	AB356276
HM067748	378	518	AB356303	AB356277
KX232608	379	519	AB356304	AB356278
EU031914	380	520	AB356305	AB356279
JQ316127	381	521	AB356306	AB356280
DQ295195	382	522	AB356307	AB356281
DQ295193	383	524	AB356308	AB356282
AB845347	384	525	AB356309	AB356283
DQ054367	385	526	AB356310	AB356284
AB845345	386	527	AB356311	AB356285
JQ316134	387	528	AB356312	AB356286
DQ295194	388	529	AB356313	AB356287
JQ316133	389	530	AB356314	AB356288
JQ316135	390	531	AB356315	AB356289
DQ314732	391	532	AB356316	AB356290
KJ140249	392	542	AB356317	AB356291
AB845346	393	543	AB356318	AB356292
EF495062	394	544	AB356319	AB356293
AB078005	395	545	AB356320	AB356294
KJ140260	396	546	AB356321	AB356295
KY658688	397	547	AB356322	AB356296
KF384812	398	548	AB356323	AB356297
KF384800	399	549	AB356324	AB356298
KF384798	400	550	AB356325	AB356299
KF384802	401	551	AB356326	AB356300
KF384810	402	552	AB356327	AB356301
KF384808	403	553	AB356328	AB356302
FJ771006	404	554	AB356329	AB356303
KF384814	405	555	AB356330	AB356304
KF384807	406	556	AB356331	AB356305
KF384809	407	557	AB356332	AB356306
KF384806	408	558	AB356333	AB356307
KF384805	409	559	AB356334	AB356308
KF384801	410	560	AB356335	AB356309
KF384811	411	561	AB356336	AB356310
KF384813	412	562	AB356337	AB356311
JN397362	413	563	AB356338	AB356312
KF384799	414	564	AB356339	AB356313
KF384804	415	565	AB356340	AB356314
KC503853	416	566	AB356341	AB356315
KC503852	417	567	AB356342	AB356316
AY970948	418	568	AB356343	AB356317
JN571034	419	569	AB356344	AB356320
KY658702	420	570	AB356345	AB356321
KU168278	421	571	AB356346	AB356322
KY392774	422	572	AB356347	AB356323
KY658710	423	573	AB356348	AB356324
AB859012	424	574	AB356349	AB356325
AY970949	425	576	AB356350	AB356326
DQ358807	426	579	AB356351	AB356327
JQ316132	427	580	AB356352	AB356328
KU168276	428	581	AB356353	AB356329
DQ358809	429	582	AB356354	AB356330
EF029069	430	585	AB356355	AB356331
EF029068	431	586	AB356356	AB356332
KT427793	432	587	AB356357	AB356333
DQ926898	433	589	AB356358	AB356334
GU595160	434	590	AB356359	AB356335
GU595150	435	591	AB356360	AB356336
KT284377	436	593	AB356361	AB356337
KT284378	437	594	AB356362	AB356338
KT284374	438	595	AB356363	AB356339
KT284376	439	596	AB356364	AB356340
KT284375	440	597	AB356365	AB356341
KT284371	441	600	AB356366	AB356342
KT284373	442	601	AB356367	AB356343
KT284372	443	602	AB356368	AB356344
DQ926899	444	603	AB356369	AB356345
JN397364	445	604	AB356370	AB356346
KF384803	446	605	AB356371	AB356347
KC935958	447	606	AB356372	AB356348
JN397363	448	607	AB356373	AB356349
KC935959	449	609	AB356374	AB356350
KT152839	450	610	AB356375	AB356351
KF561441	451	611	AB356376	AB356352
AB845344	452	612	AB356377	AB356353
KY658683	453	613	AB356378	AB356354
KU168279	454	614	AB356379	AB356355
KY392773	455	615	AB356380	AB356356
KY658696	456	616	AB356381	AB356357
DQ672623	457	618	AB356382	AB356358
KY658687	458	619	AB356383	AB356359
KT427767	459	871	AB356384	AB356360
GU595152	460	873	AB356385	AB356361
KT427806	461	875	AB356386	AB356362
KX232618	462	876	AB356387	AB356363
FJ771010	463	877	AB356388	AB356364
GU595162	464	878	AB356389	AB356365
GU595154	465	879	AB356390	AB356366
DQ295196	466	880	AB356391	AB356367
AY839827	467	882	AB356392	AB356368
JQ316136	468	884	AB356393	AB356369
JQ316137	469	885	AB356394	AB356370
KJ849759	470	886	AB356395	AB356371
KU749400	471	887	AB356396	AB356372
KJ849809	472	890	AB356397	AB356373
JQ316129	473	891	AB356398	AB356374
DQ295192	474	893	AB356399	AB356375
JQ316128	475	894	AB356400	AB356376
JQ316131	476	895	AB356401	AB356377
JQ316130	477	896	AB356402	AB356378
JQ316126	478	897	AB356403	AB356379
GU595157	479	898	AB356404	AB356380
KF561439	480	900	AB356405	AB356381
KJ140264	481	920	AB356406	AB356382
GU595151	482	921	AB356407	AB356383
JQ341411	483	922	AB356408	AB356384
JQ429433	484	923	AB356409	AB356385
KJ140263	485	924	AB356410	AB356386
KJ140265	486	925	AB356411	AB356387
KY359380	487	926	AB356412	AB356388
KF561436	488	928	AB356413	AB356389
KF561438	489	929	AB356414	AB356390
KF561437	490	958	AB356415	AB356391
KF561440	491	959	AB356416	AB356392
GU595158	492	960	AB356417	AB356393
GU595155	493	961	AB356418	AB356394
KF561435	494	963	AB356419	AB356395
KP223798	495	964	AB356420	AB356396
EF178351	496	965	AB356421	AB356397
KY658684	497	966	AB356422	AB356398
DQ400856	498	968	AB356423	AB356399
AY535660	499	969	AB356424	AB356400
AY535659	500	970	AB356425	AB356401
GU595159	501	971	AB356426	AB356402
KX232599	502	972	AB356427	AB356403
AY423382	503	976	AB356428	AB356404
GU595153	504	977	AB356429	AB356405
AY423386	505	986	AB356430	AB356406
KU749413	506	989	AB356431	AB356407
KU749407	507	990	AB356432	AB356408
KX232624	508	991	AB356433	AB356409
KX232594	509	992	AB356434	AB356410
AY588971	510	993	AB356435	AB356411
GQ365649	511	994	AB356436	AB356412
AY455782	512	995	AB356437	AB356413
AY586547	513	999	AB356438	AB356414
AY455783	514	1000	AB356439	AB356415
AY586548	515	1002	AB356440	AB356416
AY586549	516	1007	AB356441	AB356417
KU749399	517	1009	AB356442	AB356418
GQ365650	518	1011	AB356443	AB356419
AY455780	519	1016	AB356444	AB356420
KT982054	520	1018	AB356445	AB356421
KX232622	521	1019	AB356446	AB356422
AF408630	522	1021	AB356447	AB356423
KJ849801	523	1033	AB356448	AB356424
KU749401	524	1037	AB356449	AB356425
AF408632	525	1043	AB356450	AB356426
AF408629	526	1044	AB356451	AB356427
AY586544	527	1045	AB356452	AB356428
AY586543	528	1046	AB356453	AB356429
AY586542	529	1049	AB356454	AB356430
KJ849771	530	1050	AB356455	AB356431
DQ853467	531	1051	AB356456	AB356432
AJ271370	532	1052	AB356457	AB356433
DQ853472	533	1053	AB356458	AB356434
DQ853473	534	1054	AB356459	AB356435
DQ853474	535	1085	AB356460	AB356436
DQ853469	536	1088	AB356461	AB356437
DQ853471	537	1090	AB356462	AB356438
DQ853470	538	1091	AB356463	AB356439
DQ853468	539	1092	AB356464	AB356440
DQ853466	540	1095	AB356465	AB356441
DQ853475	541	1101	AB356466	AB356442
JQ316138	542	1103	AB356467	AB356443
KY359384	543	1104	AB356468	AB356444
KU612901	544	1105	AB356469	AB356445
KJ849774	545	1106	AB356470	AB356446
AF224507	546	1108	AB356471	AB356447
EU170154	547	1110	AB356472	AB356448
JN397365	548	1112	AB356473	AB356449
KU749397	549	1114	AB356474	AB356450
EU170153	550	1116	AB356475	AB356451
KU749389	551	1117	AB356476	AB356452
EU170149	552	1118	AB356477	AB356453
EU170147	553	1119	AB356478	AB356454
EU170146	554	1120	AB356479	AB356455
EU170144	555	1121	AB356480	AB356456
EU170142	556	1122	AB356481	AB356457
EU170140	557	1140	AB356482	AB356458
EU170139	558	1141	AB356483	AB356459
EU170136	559	1143	AB356484	AB356460
EU170135	560	1146	AB356485	AB356461
JX500699	561	1147	AB356486	AB356462
JN230353	562	1155	AB356487	AB356463
DQ487191	563	1157	AB356488	AB356464
JX500701	564	1158	AB356489	AB356465
EU170143	565	1159	AB356490	AB356466
JX500703	566	1161	AB356491	AB356467
JX500705	567	1162	AB356492	AB356470
JX500707	568	1163	AB356493	AB356471
JX500709	569	1165	AB356494	AB356472
JX500700	570	1166	AB356495	AB356473
JX500708	571	1167	AB356496	AB356474
JX500697	572	1170	AB356497	AB356475
JX500695	573	1171	AB356498	AB356476
JX500702	574	1174	AB356499	AB356477
JX500706	575	1177	AB428551	AB356478
JX500704	576	1179	AB428552	AB356479
JX500694	577	1181	AB428553	AB356480
JX500698	578	1183	AB428554	AB356481
JX500696	579	1185	AB428555	AB356482
EU170151	580	1187	AB428556	AB356483
EU170138	581	1188	AB428557	AB356484
GQ365652	582	1189	AB428558	AB356485
EU735539	583	1190	AB428559	AB356486
GQ365651	584	1191	AB428560	AB356487
EU735538	585	1192	AB428561	AB356488
KP718916	586	1193	AB428562	AB356489
AF332867	587	1194	AB442228	AB356490
KU612900	588	1195	AB442229	AB356491
EU170155	589	1196	AB442230	AB356492
KT175204	590	1197	AB442231	AB356493
EU170148	591	1198	AB442232	AB356494
AY423384	592	1199	AB442233	AB356495
KP718921	593	1201	AB442234	AB356496
EU170150	594	1202	AB442235	AB356497
KP718934	595	1203	AB442236	AB356498
KP718937	596	1204	AB442237	AB356499
KP718936	597	1206	AB442238	AB428551
AY423383	598	1207	AB442239	AB428552
KT427744	599	1211	AB442240	AB428553
KY658718	600	1213	AB442241	AB428554
EU697908	601	1214	AB442242	AB428555
KU749391	602	1215	AB442243	AB428556
EU220698	603	1216	AB442244	AB428557
EU170152	604	1217	AB442245	AB428558
EU170145	605	1218	AB442246	AB428559
KJ849769	606	1219	AB442247	AB428560
AY423381	607	1220	AB442248	AB428561
AY423387	608	1221	AB442249	AB442228
KU749410	609	1224	AB442250	AB442229
KY658708	610	1226	AB442251	AB442230
FN392874	611	1228	AB442252	AB442231
KU749418	612	1230	AB442253	AB442232
FN392875	613	1233	AB442254	AB442233
KU749396	614	1234	AB442255	AB442234
KP718938	615	1235	AB442256	AB442235
AY771589	616	1236	AB442257	AB442236
KC156309	617	1237	AB442258	AB442237
KF527068	618	1238	AB442259	AB442238
JQ779099	619	1242	AB442260	AB442239
KC156489	620	1244	AB442261	AB442240
KF527080	621	1246	AB442262	AB442241
JQ779101	622	1247	AB442263	AB442242
KC156346	623	1248	AB442264	AB442243
KF527079	624	1249	AB442265	AB442244
JQ779258	625	1250	AB442266	AB442245
KC156491	626	1252	AB442267	AB442246
KF527078	627	1254	AB442268	AB442247
JQ779217	628	1256	AB442269	AB442248
KC156499	629	1257	AB442270	AB442249
KF527077	630	1260	AB442271	AB442250
JQ779275	631	1263	AB442272	AB442251
KC156493	632	1266	AB442273	AB442252
KF527076	633	1273	AB442274	AB442253
JQ779114	634	1275	AB442275	AB442254
KC156495	635	1277	AB442276	AB442255
KF527075	636	1279	AB442277	AB442256
JQ779164	637	1280	AB442278	AB442257
KC156497	638	1281	AB442279	AB442258
KF527074	639	1282	AB442280	AB442259
JQ779151	640	1284	AB442281	AB442260
KC156487	641	1292	AB442282	AB442261
KF527073	642	1297	AB442283	AB442262
JQ779284	643	1301	AB442284	AB442263
KC156481	644	1303	AB442285	AB442264
KF527072	645	1308	AB442286	AB442265
JQ779282	646	1310	AB442287	AB442266
KC156485	647	1311	AB442288	AB442267
KF527071	648	1312	AB442289	AB442268
JQ779280	649	1313	AB442290	AB442269
KC156483	650	1314	AB442291	AB442270
KF527070	651	1315	AB442292	AB442271
JQ779278	652	1316	AB442293	AB442272
KC156473	653	1319	AB442294	AB442273
KF527069	654	1322	AB442295	AB442274
JQ779276	655	1324	AB442296	AB442275
KC156477	656	1331	AB442297	AB442276
KF527067	657	1332	AB442298	AB442277
JQ779274	658	1335	AB442299	AB442278
KC156475	659	1346	AB442300	AB442279
KF527066	660	1347	AB442301	AB442280
JQ779272	661	1348	AB442302	AB442281
KC156429	662	1350	AB442303	AB442282
KF527065	663	1351	AB442304	AB442283
JQ779270	664	1352	AB442305	AB442284
KC156427	665	1353	AB442306	AB442285
KF527064	666	1354	AB442307	AB442286
JQ779268	667	1357	AB442308	AB442287
KC156363	668	1358	AB442309	AB442288
KF527063	669	1359	AB442310	AB442289
JQ779266	670	1360	AB442311	AB442290
KC156367	671	1361	AB442312	AB442291
KF527062	672	1362	AB442313	AB442292
JQ779264	673	1363	AB442314	AB442293
KC156369	674	1365	AB442315	AB442294
KF527061	675	1366	AB442316	AB442295
JQ779262	676	1367	AB442317	AB442296
KC156313	677	1369	AB442318	AB442297
KF527060	678	1371	AB442319	AB442298
JQ779260	679	1373	AB442320	AB442299
KC156355	680	1375	AB442321	AB442300
JQ779103	681	1376	AB442322	AB442301
KC156361	682	1380	AB442323	AB442302
JQ779256	683	1381	AB442324	AB442303
KC156359	684	1387	AB442325	AB442304
JQ779224	685	1389	AB442326	AB442305
KC156315	686	1391	AB442327	AB442306
JQ779222	687	1393	AB442328	AB442307
KC156349	688	1394	AB442329	AB442308
JQ779220	689	1395	AB442330	AB442309
KC156353	690	1397	AB442331	AB442310
JQ779218	691	1399	AB442332	AB442311
KC156351	692	1401	AB442333	AB442312
JQ779216	693	1403	AB442334	AB442313
KC156317	694	1404	AB442335	AB442314
JQ779214	695	1405	AB442336	AB442315
KC156347	696	1407	AB442337	AB442316
JQ779212	697	1409	AB442338	AB442317
KC156345	698	1411	AB442339	AB442318
JQ779210	699	1413	AB442340	AB442319
KC156205	700	1415	AB442341	AB442320
JQ779208	701	1417	AB442342	AB442321
KC156255	702	1419	AB442343	AB442322
JQ779206	703	1421	AB442344	AB442323
KC156297	704	1423	AB442345	AB442324
JQ779168	705	1425	AB442346	AB442325
KC156305	706	1427	AB442347	AB442326
JQ779166	707	1429	AB442348	AB442327
KC156307	708	1431	AB442349	AB442328
JQ779162	709	1433	AB442350	AB442329
KC156299	710	1435	AB442351	AB442330
JQ779160	711	1437	AB442352	AB442331
KC156303	712	1439	AB442353	AB442332
JQ779158	713	1441	AB442354	AB442333
KC156301	714	1443	AB442355	AB442334
JQ779156	715	1445	AB442356	AB442335
KC156209	716	1487	AB442357	AB442336
JQ779154	717	1488	AB442358	AB442337
KC156257	718	1489	AB442359	AB442338
JQ779152	719	1498	AB442360	AB442339
KC156265	720	1502	AB468573	AB442340
JQ779150	721	1506	AB468574	AB442341
KC156267	722	1508	AB468575	AB442342
JQ779148	723	1510	AB519452	AB442343
KC156259	724	1512	AB519453	AB442344
JQ779126	725	1514	AB519454	AB442345
KC156263	726	1516	AB519455	AB442346
JQ779124	727	1519	AB519456	AB442347
KC156261	728	1523	AB519457	AB442348
JQ779122	729	1524	AB519458	AB442349
KC156479	730	1526	AB519459	AB442350
JQ779120	731	1528	AB519460	AB442351
KC156371	732	1530	AB519461	AB442352
JQ779118	733	1532	AB519462	AB442353
KC156480	734	1535	AB519463	AB442354
JQ779116	735	1536	AB519464	AB442355
KC156253	736	1537	AB519465	AB442356
JQ779112	737	1539	AB519466	AB442357
KC156405	738	1540	AB519467	AB442358
JQ779110	739	1542	AB519468	AB442359
KC156482	740	1544	AB519469	AB442360
JQ779108	741	1545	AB519470	AB468573
KC156403	742	1546	AB519471	AB468574
JQ779106	743	1548	AB519472	AB468575
KC156484	744	1550	AB519473	AB519452
JQ779104	745	1552	AB519474	AB519453
KC156496	746	1554	AB519475	AB519454
JQ779102	747	1555	AB519476	AB519455
KC156348	748	1556	AB519477	AB519456
JQ779100	749	1557	AB519478	AB519457
KC156486	750	1558	AB519479	AB519458
JQ779098	751	1562	AB519480	AB519459
KC156488	752	1577	AB519481	AB519460
JQ779285	753	1586	AB519482	AB519461
KC156207	754	1589	AB519483	AB519462
JQ779283	755	1608	AB519484	AB519463
KC156350	756	1610	AB519485	AB519464
JQ779281	757	1612	AB519486	AB519465
KC156428	758	1614	AB519487	AB519466
JQ779279	759	1616	AB519488	AB519467
KC156476	760	1639	AB519489	AB519468
JQ779277	761	1642	AB519490	AB519469
KC156478	762	1644	AB519491	AB519470
JQ779273	763	1664	AB519492	AB519471
KC156430	764	1665	AB519493	AB519472
JQ779271	765	1666	AB519494	AB519473
KC156474	766	1671	AB519495	AB519475
JQ779269	767	1672	AB519496	AB519476
KC156472	768	1673	AB519497	AB519477
JQ779267	769	1674	AB519498	AB519478
KC156352	770	1675	AB519499	AB519479
JQ779265	771	1676	AB519500	AB519482
KC156368	772	1677	AB519501	AB519483
JQ779263	773	1678	AB519502	AB519484
KC156406	774	1679	AB519503	AB519485
JQ779261	775	1680	AB519504	AB519486
KC156370	776	1681	AB519505	AB519487
JQ779259	777	1683	AB519506	AB519488
KC156404	778	1685	AB519507	AB519489
JQ779257	779	1686	AB519508	AB519490
KC156402	780	1687	AB519509	AB519491
JQ779225	781	1688	AB519510	AB519492
KC156354	782	1689	AB519511	AB519493
JQ779223	783	1690	AB519512	AB519494
KC156362	784	1691	AB519513	AB519495
JQ779221	785	1692	AB519514	AB519496
KC156366	786	1693	AB519515	AB519497
JQ779219	787	1694	AB519516	AB519498
KC156364	788	1695	AB519517	AB519499
JQ779215	789	1696	AB519518	AB519500
KC156356	790	1697	AB519519	AB519501
JQ779213	791	1698	AB519520	AB519502
KC156360	792	1699	AB519521	AB519503
JQ779211	793	1700	AB519522	AB519504
KC156358	794	1701	AB519523	AB519505
JQ779209	795	1703	AB519524	AB519506
KC156201	796	1704	AB519525	AB519507
JQ779207	797	1705	AB519526	AB519508
KC156204	798	1706	AB519527	AB519509
JQ779169	799	1707	AB519528	AB519510
KC156266	800	1708	AB519529	AB519511
JQ779167	801	1710	AB519530	AB519512
KC156344	802	1711	AB519531	AB519513
JQ779165	803	1712	AB519532	AB519514
KC156310	804	1716	AB519533	AB519515
JQ779163	805	1717	AB519534	AB519516
KC156312	806	1718	AB519535	AB519517
JQ779161	807	1719	AB519536	AB519518
KC156316	808	1722	AB519537	AB519519
JQ779159	809	1725	AB519538	AB519522
KC156314	810	1727	AB519539	AB519523
JQ779157	811	1728	AB519540	AB519524
KC156268	812	1729	AB519541	AB519525
JQ779155	813	1730	AB519542	AB519526
KC156304	814	1731	AB519543	AB519527
JQ779153	815	1733	AB519544	AB519528
KC156308	816	1734	AB519545	AB519529
JQ779149	817	1735	AB519546	AB519530
KC156306	818	1736	AB519547	AB519531
JQ779127	819	1737	AB519548	AB519532
KC156298	820	1739	AB519549	AB519533
JQ779125	821	1740	AB519550	AB519536
KC156302	822	1741	AB519551	AB519537
JQ779123	823	1742	AB519552	AB519538
KC156300	824	1743	AB519553	AB519539
JQ779121	825	1744	AB519554	AB519540
KC156252	826	1745	AB519555	AB519541
JQ779119	827	1746	AB519556	AB519542
KC156260	828	1747	AB519557	AB519543
JQ779117	829	1748	AB519558	AB519544
KC156264	830	1749	AB519559	AB519545
JQ779115	831	1750	AB519560	AB519546
KC156262	832	1751	AB519561	AB519547
JQ779113	833	1752	AB519562	AB519548
KC156254	834	1753	AB519563	AB519549
JQ779111	835	1754	AB519564	AB519550
KC156258	836	1756	AB519565	AB519551
JQ779109	837	1760	AB519566	AB519552
KC156256	838	1762	AB519567	AB519553
JQ779107	839	1765	AB519568	AB519554
KC156199	840	1767	AB519569	AB519555
JQ779105	841	1773	AB519570	AB519556
KC156208	842	1774	AB519571	AB519557
KC156206	843	1776	AB519572	AB519558
KC156179	844	1777	AB519573	AB519559
KC156181	845	1778	AB519574	AB519560
KC156195	846	1780	AB519575	AB519561
KC156197	847	1781	AB519576	AB519562
KC156202	848	1782	AB519577	AB519563
KC156194	849	1783	AB519578	AB519564
KC156196	850	1787	AB519579	AB519565
KC156200	851	1792	AB519580	AB519566
KC156198	852	1793	AB519581	AB519567
KC156180	853	1795	AB519582	AB519568
KC156188	854	1797	AB519583	AB519569
KC156192	855	1799	AB519584	AB519570
KC156190	856	1802	AB519585	AB519571
KC156182	857	1803	AB519586	AB519572
KC156186	858	1806	AB519587	AB519573
KC156184	859	1808	AB519588	AB519574
KC156193	860	1812	AB519589	AB519575
KC156183	861	1814	AB519590	AB519576
KC156185	862	1815	AB519591	AB519577
KC156187	863	1820	AB519592	AB519578
KC156191	864	1823	AB519593	AB519579
KC156189	865	1825	AB519594	AB519580
KC156203	866	1826	AB519595	AB519581
KC156498	867	1827	AB519625	AB519582
KC156490	868	1828	AB519626	AB519583
KC156492	869	1829	AB519627	AB519586
KC156494	870	1830	AB519629	AB519587
EU697905	871	1831	AB519630	AB519588
KC156365	872	1832	AB519631	AB519589
EU697909	873	1833	AB519632	AB519590
GU237072	874	1834	AB519633	AB519591
EU697904	875	1835	AB519634	AB519592
EU697906	876	1836	AB519635	AB519593
EU697907	877	1837	AB587097	AB519594
FJ389363	878	1838	AB587098	AB519595
FJ389367	879	1839	AB587099	AB519596
AY772535	880	1840	AB587100	AB519597
KT427749	881	1841	AB587101	AB519598
KY359385	882	1842	AB587102	AB519599
AY423385	883	1843	AB587103	AB519600
FJ711703	884	1844	AB587104	AB519601
KX232612	885	1845	AB587105	AB519602
KU749388	886	1846	AB587106	AB519603
AY882421	887	1847	AB587107	AB519604
JN692473	888	1848	AB587108	AB519605
KU749409	889	1849	AB587109	AB519606
FN392876	890	1850	AB587110	AB519607
KX232609	891	1851	AB587111	AB519608
KC156357	892	1852	AB587112	AB519609
EU735540	893	1853	AB587113	AB519610
FN392877	894	1854	AB587114	AB519611
KX232627	895	1855	AB587115	AB519612
KU749394	896	1856	AB587116	AB519613
KU749395	897	1857	AB587117	AB519614
KY658709	898	1858	AB587118	AB519615
KC156409	899	1859	AB640054	AB519616
KJ671534	900	1860	AB640055	AB519617
KC156421	901	1861	AB640056	AB519618
KC156413	902	1862	AB640057	AB519619
KC156423	903	1863	AB640058	AB519620
KC156425	904	1864	AB640059	AB519621
KC156415	905	1865	AB640060	AB519622
KC156419	906	1866	AB640061	AB519623
KC156411	907	1867	AB640062	AB519624
KC156417	908	1868	AB640063	AB587097
KC156407	909	1869	AB640064	AB587098
KC156412	910	1870	AB640065	AB587099
KC156414	911	1871	AB640066	AB587100
KC156422	912	1872	AB640067	AB587101
KC156426	913	1873	AB640068	AB587102
KC156424	914	1874	AB640069	AB587103
KC156416	915	1875	AB640070	AB587104
KC156420	916	1876	AB640071	AB587105
KC156418	917	1877	AB640072	AB587106
KC156410	918	1878	AB640073	AB587107
KC156408	919	1879	AB640074	AB587108
KP873162	920	1880	AB640075	AB587109
KY658706	921	1881	AB640076	AB587110
KP873164	922	1882	AB640078	AB587111
KP873163	923	1883	AB640080	AB587112
KP873161	924	1884	AB640082	AB587113
KU901943	925	1885	AB640084	AB587114
KX232611	926	1886	AB640086	AB587115
KU901953	927	1887	AB640088	AB587116
KX232610	928	1888	AB640090	AB587117
KU901983	929	1889	AB640092	AB587118
KU901992	930	1890	AB640094	AB640054
KU901997	931	1891	AB640096	AB640055
KU901993	932	1892	AB640098	AB640056
KU901994	933	1893	AB640100	AB640057
KU901984	934	1894	AB640101	AB640058
KU901989	935	1895	AB640102	AB640059
KU901991	936	1896	AB640103	AB640060
KU901990	937	1897	AB640104	AB640061
KU901985	938	1898	AB640105	AB640062
KU901988	939	1899	AB640106	AB640063
KU901986	940	1900	AB640107	AB640064
KU901954	941	1901	AB640108	AB640067
KU901971	942	1902	AB640109	AB640068
KU901975	943	1903	AB640110	AB640069
KU901980	944	1904	AB640111	AB640070
KU901976	945	1905	AB640112	AB640071
KU901972	946	1906	AB640113	AB640072
KU901974	947	1907	AB640115	AB640073
KU901973	948	1908	AB640116	AB640074
KU901955	949	1909	AB640117	AB640075
KU901959	950	1910	AB640118	AB640076
KU901970	951	1911	AB640120	AB640077
KU901969	952	1912	AB640121	AB640079
KU901956	953	1913	AB640122	AB640081
KU901958	954	1914	AB640123	AB640083
KU901957	955	1915	AB640124	AB640085
KU901941	956	1916	AB640125	AB640087
KU901942	957	1917	AB640126	AB640089
JX112850	958	1918	AB640127	AB640091
KJ184176	959	1919	AB640128	AB640093
FJ389364	960	1920	AB640129	AB640095
FJ389365	961	1921	AB640130	AB640097
KC156311	962	1922	AB640131	AB640099
JX112841	963	1923	AB640132	AB640101
KY498771	964	1924	AB640133	AB640103
AY894995	965	1925	AB640134	AB640104
KJ849779	966	1926	AB640136	AB640105
KU749392	967	1927	AB640137	AB640106
KJ140254	968	1928	AB640138	AB640107
KC870032	969	1929	AB640139	AB640108
KP718935	970	1930	AB640140	AB640110
KU749411	971	1931	AB640141	AB640111
FJ389366	972	1932	AB640142	AB640112
AF110976	973	1933	AB640143	AB640113
AF110977	974	1934	AB640144	AB640114
AF110978	975	1935	AB640145	AB640115
AF110962	976	1936	AB640146	AB640116
AF110973	977	1937	AB640147	AB640117
AF110975	978	1938	AB640148	AB640118
AF110974	979	1939	AB640149	AB640119
AF110963	980	1940	AB640150	AB640121
AF110967	981	1941	AB640151	AB640122
AF110968	982	1942	AB640152	AB640123
AF110964	983	1943	AB640153	AB640124
AF110966	984	1944	AB640154	AB640125
AF110965	985	1945	AB640155	AB640126
AF110959	986	1946	AB640156	AB640127
AF110961	987	1947	AB640157	AB640128
AF110960	988	1948	AB640158	AB640129
EU693240	989	1949	AB640159	AB640130
AY682547	990	1950	AB640160	AB640131
FJ864679	991	1951	AB640161	AB640132
AY751406	992	1952	AB640162	AB640133
AY500393	993	1953	AB640163	AB640134
FM877780	994	1954	AB640164	AB640135
KC990125	995	1955	AB640165	AB640136
KY658707	996	1956	AB640166	AB640137
KF250367	997	1957	AB640167	AB640138
JN692465	998	1958	AB640168	AB640139
KY112135	999	1959	AB640169	AB640140
FJ195091	1000	1960	AB640170	AB640141
KT427790	1001	1961	AB640171	AB640142
JN692475	1002	1962	AB640172	AB640143
JN692464	1003	1963	AB640173	AB640144
KT427769	1004	1965	AB640174	AB640145
DQ845387	1005	1966	AB640175	AB640146
KT427779	1006	1967	AB640176	AB640147
DQ845386	1007	1968	AB640177	AB640148
KT427733	1008	1969	AB640178	AB640149
DQ845388	1009	1970	AB640179	AB640152
KT427854	1010	1971	AB640180	AB640153
KX579838	1011	1972	AB640181	AB640154
KJ849804	1012	1973	AB640182	AB640155
KT427723	1013	1974	AB640183	AB640156
KT427730	1014	1975	AB640184	AB640157
EU735537	1015	1976	AB640185	AB640158
KU749390	1016	1978	AB640186	AB640159
EU735535	1017	1979	AB640187	AB640160
JX447541	1018	1980	AB640188	AB640161
KY112490	1019	1981	AB640189	AB640162
KT427706	1020	1982	AB640190	AB640163
EU735534	1021	1983	AB640191	AB640164
KJ671535	1022	1984	AB640192	AB640165
KT427699	1023	1985	AB640193	AB640166
KJ849794	1024	1987	AB640194	AB640167
KT427719	1025	1988	AB640195	AB640168
KJ849791	1026	1989	AB640196	AB640169
KT427650	1027	1990	AB640197	AB640170
KT427735	1028	1991	AB640198	AB640171
KT427780	1029	1992	AB640199	AB640172
KT427708	1030	1993	AB640200	AB640173
KT427827	1031	1994	AB640201	AB640174
KT427840	1032	1995	AB640202	AB640175
KJ849820	1033	1996	AB640203	AB640176
KT427697	1034	1997	AB640204	AB640177
KJ849816	1035	1998	AB640205	AB640178
KT427760	1036	1999	AB640206	AB640179
KJ849800	1037	2000	AB640207	AB640180
KT427809	1038	2001	AB640208	AB640181
KJ849782	1039	2002	AB640209	AB640182
KT427666	1040	2005	AB640210	AB640183
KT427738	1041	2006	AB640211	AB640184
KT427709	1042	2007	AB640212	AB640185
KX232613	1043	2008	AB640213	AB640186
AY532635	1044	2009	AB640214	AB640187
JA446000	1045	2010	AB640215	AB640188
GQ324962	1046	2011	AB640217	AB640189
HQ179987	1047	2012	AB640218	AB640192
GQ324959	1048	2013	AB640219	AB640193
KX232607	1049	2014	AB640220	AB640194
DQ017383	1050	2015	AB640221	AB640195
GQ324958	1051	2016	AB640222	AB640196
DQ017382	1052	2017	AB640224	AB640197
DQ358803	1053	2018	AB640225	AB640198
KJ849817	1054	2019	AB640226	AB640199
KT427782	1055	2020	AB640227	AB640200
KJ849812	1056	2021	AB640228	AB640201
KT427823	1057	2022	AB640229	AB640202
KJ849811	1058	2023	AB640230	AB640203
KT427685	1059	2024	AB640231	AB640204
KJ849787	1060	2025	AB640232	AB640205
KT427696	1061	2026	AB640233	AB640206
KJ849776	1062	2027	AB640234	AB640207
KT427754	1063	2028	AB640235	AB640208
KJ849767	1064	2029	AB640236	AB640209
KT427746	1065	2030	AB640237	AB640210
KJ849761	1066	2031	AB640238	AB640211
KT427873	1067	2032	AB640239	AB640212
KT427717	1068	2033	AB640240	AB640213
KT427821	1069	2034	AB640241	AB640214
KT427778	1070	2035	AB640242	AB640215
KT427794	1071	2036	AB640243	AB640216
KT427796	1072	2037	AB640244	AB640217
KT427815	1073	2038	AB640245	AB640218
KT427741	1074	2039	AB640246	AB640219
KT427743	1075	2040	AB640247	AB640220
KT427812	1076	2041	AB640248	AB640221
KT427786	1077	2042	AB640249	AB640222
KT427802	1078	2043	AB640250	AB640223
KT427672	1079	2044	AB640251	AB640224
KT427820	1080	2045	AB640252	AB640225
KT427675	1081	2046	AB640253	AB640226
KT427669	1082	2047	AB640254	AB640227
KT427797	1083	2048	AB640255	AB640228
KT427837	1084	2049	AB640256	AB640229
KP718917	1085	2050	AB640257	AB640230
KJ849790	1086	2051	AB640258	AB640231
KT427872	1087	2052	AB640259	AB640232
KP718927	1088	2053	AB640260	AB640233
KT427755	1089	2054	AB640261	AB640236
KP718928	1090	2055	AB640262	AB640237
KY359383	1091	2056	AB640263	AB640238
AY322189	1092	2057	AB640264	AB640239
KU749414	1093	2058	AB640265	AB640240
KT427765	1094	2059	AB640266	AB640241
KX232617	1095	2060	AB640267	AB640242
KT427825	1096	2061	AB640268	AB640243
KY359381	1097	2062	AB640269	AB640244
KT427689	1098	2063	AB640270	AB640245
KJ849808	1099	2064	AB640271	AB640247
KT427795	1100	2065	AB640272	AB640248
KJ849762	1101	2066	AB640273	AB640249
JQ292894	1102	2067	AB640274	AB640250
KF859741	1103	2068	AB640275	AB640251
AF539404	1104	2069	AB640276	AB640252
KX228804	1105	2070	AB640277	AB640253
AY169812	1106	2075	AB640278	AB640254
KX232619	1107	2076	AB640279	AB640255
AY169813	1108	2078	AB640280	AB640256
JX976673	1109	2079	AB640281	AB640257
AY169804	1110	2084	AB640282	AB640258
JX976678	1111	2086	AB640283	AB640259
AY169808	1112	2090	AB640284	AB640260
JX976674	1113	2091	AB640285	AB640261
AY169810	1114	2092	AB640286	AB640262
JX976676	1115	2093	AB640287	AB640263
AY169809	1116	2095	AB640288	AB640264
KY112532	1117	2096	AB640289	AB640265
AY322190	1118	2097	AB640290	AB640266
AY169806	1119	2099	AB640291	AB640267
AY169803	1120	2101	AB640292	AB640268
DQ853464	1121	2103	AB640293	AB640269
DQ853465	1122	2105	AB640294	AB640271
DQ853449	1123	2107	AB640295	AB640272
DQ853457	1124	2109	AB640296	AB640273
DQ853463	1125	2111	AB640297	AB640274
DQ853462	1126	2113	AB640298	AB640275
DQ853458	1127	2115	AB640299	AB640276
DQ853460	1128	2117	AB640300	AB640277
DQ853459	1129	2119	AB640301	AB640278
DQ853450	1130	2121	AB640302	AB640279
DQ853454	1131	2123	AB640303	AB640280
DQ853456	1132	2125	AB640304	AB640281
DQ853455	1133	2127	AB640305	AB640282
DQ853451	1134	2147	AB640306	AB640283
DQ853453	1135	2148	AB640307	AB640284
DQ853452	1136	2150	AB640308	AB640285
DQ853438	1137	2155	AB640309	AB640286
DQ853437	1138	2167	AB640310	AB640287
DQ853436	1139	2170	AB640311	AB640288
AY322193	1140	2173	AB640312	AB640289
AY169816	1141	2176	AB640313	AB640290
KJ849826	1142	2177	AB640314	AB640291
AY169802	1143	2178	AB640315	AB640292
KJ849799	1144	2181	AB640316	AB640293
KT427785	1145	2185	AB640317	AB640294
KX232620	1146	2188	AB640318	AB640295
KJ849775	1147	2189	AB640319	AB640296
KT427764	1148	2190	AB640320	AB640297
KT427850	1149	2191	AB640321	AB640298
KT427805	1150	2193	AB640322	AB640299
KT427810	1151	2195	AB640323	AB640300
KT427804	1152	2196	AB640324	AB640301
KT427661	1153	2228	AB640325	AB640302
KT427668	1154	2231	AB640326	AB640303
GQ328744	1155	2238	AB640327	AB640304
JQ292893	1156	2240	AB640328	AB640305
KC473830	1157	2242	AB640329	AB640306
KY658711	1158	2249	AB640330	AB640307
AY169815	1159	2251	AB640331	AB640308
KX232606	1160	2258	AB640332	AB640309
AY169807	1161	2284	AB640333	AB640311
AY322191	1162	2286	AB640334	AB640312
KR017772	1163	2289	AB640335	AB640314
KT427813	1164	2299	AB640336	AB640315
KX398187	1165	2304	AB640337	AB640316
AY322185	1166	2319	AB640338	AB640317
KX232597	1167	2362	AB640339	AB640318
JX976692	1168	2363	AB640340	AB640319
KT427700	1169	2391	AB640341	AB640320
KR017771	1170	2408	AB640342	AB640321
GQ999977	1171	2418	AB640343	AB640322
AY322187	1172	2422	AB640344	AB640323
JX976718	1173	2432	AB640345	AB640324
GQ999991	1174	2434	AB640346	AB640325
AY727522	1175	2458	AB640347	AB640326
JX976717	1176	2464	AB640348	AB640327
GQ999990	1177	2472	AB640349	AB640328
JX976707	1178	2500	AB640350	AB640329
GQ999989	1179	2502	AB640351	AB640330
JX976710	1180	2504	AB640352	AB640331
GQ999987	1181	2506	AB640353	AB640332
JX976672	1182	2508	AB640354	AB640333
GQ999986	1183	2513	AB640355	AB640334
JX976642	1184	2514	AB640356	AB640335
GQ999985	1185	2515	AB640357	AB640336
JX976632	1186	2517	AB640358	AB640337
GQ999983	1187	2519	AB640359	AB640338
GQ999982	1188	2520	AB640360	AB640339
GQ999981	1189	2521	AB640361	AB640340
GQ999980	1190	2543	AB640362	AB640341
GQ999979	1191	2546	AB640363	AB640342
GQ999978	1192	2553	AB640364	AB640343
GQ999976	1193	2561	AB640365	AB640344
GQ999975	1194	2564	AB640366	AB640345
GQ999974	1195	2580	AB640367	AB640346
GQ999973	1196	2582	AB640368	AB640347
GQ999972	1197	2584	AB640369	AB640348
JX976731	1198	2586	AB640370	AB640349
DQ358810	1199	2618	AB640371	AB640350
KX232625	1200	2667	AB640372	AB640351
KR017775	1201	2680	AB640373	AB640352
AY169814	1202	2710	AB640374	AB640353
KR017774	1203	2712	AB640375	AB640354
GQ372989	1204	2770	AB640376	AB640355
KT427789	1205	2772	AB640377	AB640356
KR017773	1206	2818	AB640378	AB640357
FJ670522	1207	2884	AB640379	AB640358
JN692443	1208	2886	AB640380	AB640359
AY727524	1209	2888	AB640381	AB640360
JN692436	1210	2890	AB640382	AB640361
FJ771009	1211	2892	AB640383	AB640362
JN692438	1212	2898	AB640384	AB640363
KX232605	1213	2904	AB640385	AB640364
FJ670518	1214	2918	AB640386	AB640365
FJ670515	1215	3054	AB640387	AB640366
AY536235	1216	3088	AB640388	AB640367
GQ372990	1217	3090	AB640389	AB640368
EU786680	1218	3236	AB640390	AB640369
GQ372988	1219	3240	AB640391	AB640372
EU786673	1220	3241	AB640392	AB640373
GQ290462	1221	3245	AB640393	AB640374
AY727527	1222	3263	AB640394	AB640375
KT427865	1223	3265	AB640395	AB640376
DQ358806	1224	3267	AB640396	AB640377
KT427762	1225	3279	AB640397	AB640378
AF408631	1226	3285	AB640398	AB640379
KT427748	1227	3289	AB640399	AB640380
KC797225	1228	3305	AB640400	AB640381
KJ849772	1229	3315	AB640401	AB640382
KC113008	1230	3319	AB640402	AB640383
KY658704	1231	3331	AB640403	AB640384
GU362882	1232	3333	AB640404	AB640385
JQ292900	1233	3335	AB640405	AB640386
KY496622	1234	3343	AB640406	AB640387
JQ292896	1235	3349	AB640407	AB640388
JQ292898	1236	3365	AB640408	AB640389
JQ292899	1237	3369	AB640409	AB640390
GU362881	1238	3373	AB640410	AB640391
JN692472	1239	3377	AB640411	AB640392
JN692479	1240	3383	AB640412	AB640393
JN692441	1241	3390	AB640413	AB640394
FJ670516	1242	3396	AB640414	AB640395
JN692455	1243	3493	AB640415	AB640396
HM026456	1244	3500	AB640416	AB640397
JN692474	1245	3502	AB640417	AB640398
EF091932	1246	3504	AB640418	AB640399
JN692445	1247	3509	AB640419	AB640400
DQ358812	1248	3511	AB640420	AB640401
JN692449	1249	3520	AB640421	AB640402
DQ358804	1250	3529	AB640422	AB640403
JN692433	1251	3534	AB640423	AB640404
DQ358802	1252	3537	AB640424	AB640405
JN692435	1253	3540	AB640425	AB640406
DQ358801	1254	3547	AB640426	AB640407
JN692454	1255	3549	AB640427	AB640410
AY586545	1256	3552	AB640428	AB640411
JN692456	1257	3570	AB640429	AB640412
KJ883148	1258	3608	AB640430	AB640413
JN692434	1259	3612	AB640431	AB640414
KJ883144	1260	3619	AB640432	AB640415
JN692432	1261	3623	AB640433	AB640416
KJ883147	1262	3625	AB640434	AB640417
JN692469	1263	3635	AB640435	AB640418
KJ883139	1264	3636	AB640436	AB640419
JN692471	1265	3637	AB640437	AB640420
KJ883149	1266	3638	AB640438	AB640421
FJ195090	1267	3643	AB640439	AB640422
KT427716	1268	3650	AB640440	AB640423
FJ195089	1269	3653	AB640441	AB640424
KT427811	1270	3655	AB640442	AB640425
AY727525	1271	3656	AB640443	AB640426
KT427799	1272	3661	AB640444	AB640427
KC113011	1273	3664	AB640445	AB640428
KT427770	1274	3665	AB640446	AB640429
JX112844	1275	3666	AB640447	AB640430
KT427763	1276	3670	AB640448	AB640431
KX232601	1277	3672	AB640449	AB640432
KT427822	1278	3674	AB640450	AB640433
KY465969	1279	3677	AB640451	AB640434
FJ670519	1280	3678	AB640452	AB640435
KJ883152	1281	3686	AB640453	AB640436
KJ787684	1282	3689	AB640454	AB640437
JN692451	1283	3690	AB640455	AB640438
KJ883143	1284	3698	AB640456	AB640439
JN692447	1285	3747	AB640457	AB640440
KJ883145	1286	3832	AB640458	AB640441
JN692478	1287	3834	AB640459	AB640442
JN692431	1288	3836	AB640460	AB640443
JN692468	1289	3837	AB640461	AB640444
JN692452	1290	3840	AB640463	AB640445
JN692440	1291	3841	AB640464	AB640446
KJ849824	1292	3850	AB640465	AB640447
JN692459	1293	3860	AB640466	AB640448
KT427649	1294	3863	AB640467	AB640449
JN692476	1295	3864	AB640468	AB640450
KT427774	1296	3866	AB640469	AB640451
JQ292897	1297	3872	AB640470	AB640452
KT427862	1298	3873	AB640471	AB640453
FJ771008	1299	3874	AB640472	AB640454
KT427801	1300	3875	AB640474	AB640455
JX112852	1301	3883	AB640475	AB640456
KT427663	1302	3884	AB640476	AB640457
JX112807	1303	3887	AB640477	AB640458
KT427798	1304	3893	AB640478	AB640459
JN692481	1305	3896	AB640479	AB640460
KT427704	1306	3898	AB640480	AB640461
JN692477	1307	3899	AB640481	AB640462
KT200352	1308	3900	AB640482	AB640463
GU362883	1309	3901	AB640483	AB640464
KX232626	1310	3904	AB640484	AB640465
HM026460	1311	3915	AB640485	AB640466
HM026459	1312	3916	AB640486	AB640467
HM026458	1313	3917	AB640487	AB640468
HM026455	1314	3918	AB640488	AB640469
KY359382	1315	3919	AB640489	AB640472
KC113000	1316	3920	AB640490	AB640473
KJ849802	1317	3921	AB640491	AB640474
KC113009	1318	3922	AB640492	AB640475
EF175212	1319	3923	AB640493	AB640476
KC113006	1320	3924	AB640494	AB640477
EF175211	1321	3925	AB640495	AB640478
KC113005	1322	3927	AB640496	AB640479
EF175210	1323	3928	AB640497	AB640480
JX112821	1324	3930	AB640498	AB640482
EF175209	1325	3932	AB640499	AB640483
KT427745	1326	3936	AB640500	AB640484
JX976712	1327	3942	AB640501	AB640487
KJ883142	1328	3948	AB640502	AB640488
KT427702	1329	3949	AB640503	AB640489
KJ883141	1330	3956	AB640504	AB640490
KR017779	1331	3959	AB640505	AB640491
JX112857	1332	3960	AB640506	AB640492
KT427791	1333	3961	AB640507	AB640493
JX976720	1334	3962	AB640508	AB640494
JX112820	1335	3967	AB640510	AB640495
KT427814	1336	3968	AB640511	AB640496
JX976716	1337	3974	AB640513	AB640497
JX976719	1338	3980	AB640514	AB640498
JX976729	1339	3983	AB640515	AB640499
JX976721	1340	3990	AB640517	AB640500
JX976711	1341	3991	AB640518	AB640501
JX976715	1342	4001	AB640519	AB640502
JX976693	1343	4054	AB640521	AB640503
KT427736	1344	4056	AB640522	AB640504
KJ849810	1345	4058	AB640523	AB640505
GQ372986	1346	4062	AB640524	AB640506
JX447785	1347	4064	AB640525	AB640507
FJ670517	1348	4066	AB640526	AB640508
GU362886	1349	4068	AB640527	AB640509
JX112818	1350	4070	AB640528	AB640511
FJ670527	1351	4072	AB640529	AB640512
KC112998	1352	4074	AB640530	AB640514
FJ670520	1353	4076	AB640531	AB640515
KF011493	1354	4078	AB640532	AB640516
KC797226	1355	4080	AB640533	AB640518
KC797224	1356	4082	AB640534	AB640519
JX112859	1357	4083	AB640535	AB640520
JX112858	1358	4084	AB640536	AB640522
JX112855	1359	4086	AB640537	AB640523
JX112853	1360	4088	AB640538	AB640524
JX112830	1361	4090	AB640599	AB640525
JX112817	1362	4092	AB640600	AB640526
JX112802	1363	4094	AB640601	AB640527
JX976714	1364	4096	AB640602	AB640528
JX112823	1365	4098	AB640603	AB640529
JX976683	1366	4100	AB640604	AB640530
JX112816	1367	4102	AB690983	AB640531
JX976713	1368	4104	AB690984	AB640532
JX112811	1369	4106	AB690985	AB640533
JX976675	1370	4108	AB690986	AB640534
JX112808	1371	4110	AB690987	AB640535
JX976671	1372	4112	AB690988	AB640536
JX112806	1373	4114	AB690989	AB640537
JX976708	1374	4116	AB690990	AB640538
JX112801	1375	4118	AB690991	AB640539
KC990126	1376	4120	AB690992	AB640542
KT427724	1377	4122	AB690993	AB640545
AY727523	1378	4124	AB690994	AB640548
KT427678	1379	4126	AB690995	AB640551
KR017777	1380	4128	AB690996	AB640554
FJ853620	1381	4129	AB690997	AB640557
KT427703	1382	4130	AB690998	AB640560
KJ671533	1383	4132	AB690999	AB640563
KT427694	1384	4134	AB691000	AB640566
KJ849814	1385	4136	AB691001	AB640569
KT427758	1386	4138	AB691002	AB640572
KX232623	1387	4140	AB691003	AB640575
KT427808	1388	4142	AB691004	AB640578
JX112846	1389	4144	AB691005	AB640581
KT427788	1390	4146	AB691006	AB640584
JX112848	1391	4268	AB691007	AB640587
KT427831	1392	4269	AB691008	AB640590
JX112847	1393	4275	AB691009	AB640593
JF932499	1394	4283	AB691010	AB640596
JX112843	1395	4286	AB691011	AB640601
JF932489	1396	4288	AB691012	AB640602
JX112825	1397	4293	AB691013	AB640603
JX447788	1398	4323	AB691014	AB640604
JX112800	1399	4324	AB691015	AB690876
JX447790	1400	4334	AB691016	AB690877
JX112797	1401	4336	AB691017	AB690878
JX447786	1402	4338	AB691018	AB690879
GU331401	1403	4345	AB691019	AB690880
AF408627	1404	4347	AB691020	AB690881
FJ670530	1405	4349	AB691021	AB690882
GU331398	1406	4350	AB691022	AB690883
AF408628	1407	4351	AB691023	AB690884
GU331395	1408	4352	AB691024	AB690885
AY463235	1409	4353	AB691025	AB690886
GU331393	1410	4355	AB691026	AB690887
AY463236	1411	4356	AB691027	AB690888
GU331391	1412	4360	AB691028	AB690889
AY463237	1413	4362	AB691029	AB690890
GU331386	1414	4364	AB691030	AB690891
AY463226	1415	4366	AB691031	AB690892
GU331389	1416	4368	AB691032	AB690893
AY463233	1417	4370	AB691033	AB690894
GU331371	1418	4371	AB691034	AB690895
AY463234	1419	4372	AB691035	AB690896
GU331379	1420	4373	AB691036	AB690897
AY463231	1421	4374	AB691037	AB690898
GU331383	1422	4376	AB691038	AB690899
AY463232	1423	4378	AB691039	AB690900
GU331384	1424	4379	AB691040	AB690901
AY463227	1425	4381	AB691041	AB690902
GU331380	1426	4382	AB691042	AB690903
AY463230	1427	4383	AB691043	AB690904
GU331382	1428	4384	AB691044	AB690905
AY463228	1429	4385	AB691045	AB690906
GU331381	1430	4386	AB691046	AB690909
AY463229	1431	4387	AB691047	AB690910
GU331372	1432	4389	AB691048	AB690911
AY463219	1433	4390	AB691049	AB690912
GU331376	1434	4391	AB691050	AB690913
AY463223	1435	4392	AB691051	AB690914
GU331378	1436	4393	AB691052	AB690915
AY463225	1437	4394	AB691053	AB690916
GU331373	1438	4395	AB691054	AB690917
AY463224	1439	4396	AB691055	AB690918
GU331375	1440	4397	AB691056	AB690919
AY463220	1441	4399	AB691057	AB690920
GU331374	1442	4400	AB691058	AB690921
AY463222	1443	4402	AB691059	AB690922
GU331356	1444	4404	AB691060	AB690923
AY463217	1445	4405	AB691061	AB690924
GU331364	1446	4406	AB691062	AB690925
GU331368	1447	4407	AB691063	AB690926
GU331370	1448	4409	AB691064	AB690927
GU331366	1449	4411	AB691065	AB690928
GU331362	1450	4412	AB691066	AB690929
GU331358	1451	4422	AB691067	AB690930
GU331360	1452	4423	AB691068	AB690931
GU331324	1453	4424	AB691069	AB690932
GU331340	1454	4425	AB691070	AB690933
GU331348	1455	4426	AB691071	AB690934
GU331349	1456	4427	AB691072	AB690935
GU331351	1457	4428	AB691073	AB690936
GU331350	1458	4431	AB691074	AB690937
GU331341	1459	4432	AB691075	AB690938
GU331345	1460	4433	AB691076	AB690939
GU331347	1461	4434	AB691077	AB690940
GU331346	1462	4435	AB691078	AB690941
GU331342	1463	4436	AB691079	AB690942
GU331344	1464	4437	AB691080	AB690943
GU331343	1465	4438	AB691081	AB690944
GU331325	1466	4439	AB691082	AB690945
GU331333	1467	4440	AB691083	AB690946
GU331337	1468	4441	AB691084	AB690947
GU331339	1469	4442	AB703607	AB690948
GU331338	1470	4443	AB703608	AB690949
GU331334	1471	4444	AB703609	AB690950
GU331336	1472	4445	AB703610	AB690951
GU331335	1473	4446	AB703611	AB690952
GU331326	1474	4447	AB703612	AB690953
GU331330	1475	4448	AB703613	AB690954
GU331332	1476	4450	AB703614	AB690955
GU331331	1477	4451	AB703615	AB690956
GU331327	1478	4452	AB703616	AB690957
GU331329	1479	4453	AB716095	AB690958
GU331328	1480	4454	AB716096	AB690959
GU331322	1481	4455	AB716097	AB690960
GU331323	1482	4456	AB716098	AB690961
GU331318	1483	4458	AB716099	AB690962
GU331321	1484	4459	AB716100	AB690963
GU331319	1485	4460	AB716101	AB690964
GU331320	1486	4461	AB716102	AB690965
KC797175	1487	4462	AB716103	AB690966
JF320188	1488	4463	AB716104	AB690967
KC833436	1489	4464	AB716105	AB690968
JF320194	1490	4466	AB716106	AB690969
KC797228	1491	4468	AB716107	AB690970
JF320190	1492	4469	AB716108	AB690971
KC797222	1493	4470	AB716109	AB690972
JF320192	1494	4471	AB716110	AB690973
KC797221	1495	4472	AB716111	AB690974
JF320185	1496	4473	AB716112	AB690975
KC797220	1497	4474	AB716113	AB690976
JF320420	1498	4476	AB716114	AB690977
KC797219	1499	4478	AB716115	AB690978
JF320414	1500	4479	AB716116	AB690979
KC797218	1501	4484	AB716117	AB690980
KT427817	1502	4488	AB716118	AB690981
KC797217	1503	4490	AB716119	AB690982
KY112132	1504	4492	AB716120	AB703607
KC797216	1505	4494	AB716121	AB703608
KC990124	1506	4495	AB716122	AB703609
KC797215	1507	4496	AB716123	AB703610
KJ184177	1508	4498	AB716124	AB703611
KC797178	1509	4499	AB716125	AB703612
KC870035	1510	4500	AB716126	AB703613
KC797177	1511	4501	AB716127	AB703614
KF011495	1512	4502	AB716128	AB703615
KC797176	1513	4503	AB716129	AB703616
KF250381	1514	4504	AB716130	AB716095
KC797174	1515	4506	AB716131	AB716096
KF250370	1516	4507	AB716132	AB716097
KC797173	1517	4508	AB716133	AB716098
DQ853461	1518	4509	AB716134	AB716099
JF932481	1519	4510	AB716135	AB716100
KC797172	1520	4511	AB716136	AB716101
JF932478	1521	4512	AB716137	AB716102
KC797171	1522	4513	AB716138	AB716103
JF932492	1523	4514	AB716139	AB716104
JX112845	1524	4515	AB716140	AB716105
JX447789	1525	4517	AB716141	AB716106
JX112796	1526	4518	AB747376	AB716107
JF932498	1527	4519	AB747377	AB716108
JX112832	1528	4520	AB747378	AB716109
JF932480	1529	4521	AB747379	AB716110
KF850149	1530	4522	AB747380	AB716111
JF932486	1531	4523	AB747381	AB716112
JX112799	1532	4524	AB747382	AB716113
JX976687	1533	4525	AB747383	AB716114
KT427784	1534	4526	AB747384	AB716115
JF320182	1535	4527	AB747385	AB716116
FJ670528	1536	4528	AB747386	AB716117
KF011494	1537	4529	AB747387	AB716118
JF320178	1538	4530	AB747388	AB716119
FJ670531	1539	4531	AB747389	AB716120
KF250368	1540	4532	AB747390	AB716121
JF320179	1541	4533	AB747391	AB716122
FJ670529	1542	4534	AB747392	AB716123
JF320413	1543	4535	AB747393	AB716124
FJ670524	1544	4536	AB747394	AB716125
JF320074	1545	4537	AB747395	AB716126
GQ372987	1546	4538	AB747396	AB716127
JF320075	1547	4539	AB747397	AB716128
FJ853621	1548	4540	AB747398	AB716130
JF320079	1549	4541	AB747399	AB716131
JX112803	1550	4542	AB747400	AB716132
JF320073	1551	4543	AB747401	AB716133
KC112996	1552	4544	AB747402	AB716134
JF320078	1553	4545	AB747403	AB716135
JX112834	1554	4546	AB747405	AB716136
GU362885	1555	4547	AB747406	AB716137
JX112822	1556	4548	AB747407	AB716138
JF320400	1557	4549	AB747408	AB716139
AY314053	1558	4550	AB747409	AB716141
JF320397	1559	4551	AB747410	AB747376
AY314052	1560	4552	AB747411	AB747377
KT427734	1561	4553	AB747412	AB747378
KF250382	1562	4554	AB747413	AB747379
AY314047	1563	4555	AB747414	AB747380
KT427870	1564	4556	AB747415	AB747381
KC870033	1565	4557	AB747416	AB747382
AY314051	1566	4558	AB747417	AB747383
KT427695	1567	4559	AB747418	AB747384
KJ671536	1568	4560	AB747419	AB747385
AY314050	1569	4561	AB747420	AB747386
KT427776	1570	4562	AB747421	AB747387
KJ849827	1571	4563	AB747422	AB747388
AY314049	1572	4566	AB747423	AB747389
KT427761	1573	4567	AB747424	AB747390
KJ849807	1574	4568	AB747425	AB747391
AY314048	1575	4569	AB747426	AB747392
KT427756	1576	4570	AB747427	AB747393
KJ849792	1577	4571	AB747428	AB747394
AY314046	1578	4573	AB747429	AB747395
KT427751	1579	4574	AB747430	AB747396
KJ849786	1580	4575	AB747431	AB747397
AY314045	1581	4576	AB747432	AB747398
KT427722	1582	4577	AB747433	AB747399
KJ849783	1583	4578	AB747434	AB747400
AY314044	1584	4579	AB747435	AB747401
KT427845	1585	4580	AB747436	AB747402
KJ849778	1586	4583	AB747437	AB747403
AY314057	1587	4588	AB747438	AB747404
KT427787	1588	4590	AB747439	AB747405
KJ849758	1589	4592	AB747440	AB747406
AY314062	1590	4594	AB747441	AB747407
KT427816	1591	4598	AB747442	AB747408
AY314054	1592	4599	AB747443	AB747409
KT427740	1593	4600	AB747444	AB747412
AY314055	1594	4603	AB747445	AB747413
KT427670	1595	4604	AB747446	AB747414
AY314056	1596	4605	AB747447	AB747415
KT427652	1597	4606	AB747448	AB747416
AY314063	1598	4607	AB747449	AB747417
KT427781	1599	4608	AB747450	AB747418
AY314061	1600	4609	AB747451	AB747419
KT427727	1601	4610	AB747452	AB747420
AY314060	1602	4612	AB747453	AB747421
KT427829	1603	4613	AB747454	AB747422
AY314059	1604	4617	AB747455	AB747423
KT427830	1605	4619	AB747456	AB747424
AY314058	1606	4629	AB747457	AB747425
KT427698	1607	4631	AB747458	AB747426
JX112805	1608	4639	AB747459	AB747427
KT427690	1609	4641	AB747460	AB747428
JF932473	1610	4642	AB747461	AB747429
KT427720	1611	4644	AB747462	AB747430
JN024100	1612	4646	AB747463	AB747431
KT427771	1613	4648	AB747464	AB747432
KY514085	1614	4650	AB747465	AB747433
KT427757	1615	4652	AB747466	AB747434
KY465967	1616	4654	AB747467	AB747435
KT427651	1617	4656	AB747468	AB747438
GU331402	1618	4658	AB747469	AB747439
KT427683	1619	4660	AB747470	AB747440
GU331403	1620	4671	AB747471	AB747441
KT427718	1621	4672	AB747472	AB747442
GU331407	1622	4674	AB747473	AB747443
KT427826	1623	4675	AB747474	AB747444
GU331409	1624	4683	AB747475	AB747445
KT427684	1625	4685	AB747476	AB747446
GU331408	1626	4687	AB747477	AB747447
KT427676	1627	4689	AB747478	AB747448
GU331404	1628	4691	AB747479	AB747449
KT427803	1629	4693	AB747480	AB747452
GU331406	1630	4695	AB747481	AB747453
KT427705	1631	4697	AB747482	AB747454
GU331405	1632	4699	AB747483	AB747455
KT427674	1633	4701	AB747484	AB747456
GU331354	1634	4703	AB747485	AB747457
KT427792	1635	4705	AB747486	AB747458
GU331399	1636	4707	AB747487	AB747459
KT427728	1637	4709	AB747488	AB747460
GU331410	1638	4711	AB747489	AB747461
KP718925	1639	4713	AB747490	AB747462
KJ849789	1640	4715	AB747491	AB747463
GU331400	1641	4723	AB747492	AB747464
KJ849770	1642	4741	AB747493	AB747465
GU331396	1643	4743	AB747494	AB747466
KJ849768	1644	4744	AB747495	AB747467
GU331411	1645	4750	AB747496	AB747468
GU331397	1646	4751	AB747497	AB747469
GU331387	1647	4771	AB747498	AB747470
GU331394	1648	4772	AB747499	AB747471
GU331392	1649	4774	AB747500	AB747472
GU331353	1650	4783	AB747501	AB747473
GU331388	1651	4785	AB747502	AB747474
GU331390	1652	4787	AB747503	AB747475
GU331385	1653	4789	AB747504	AB747476
GU331355	1654	4791	AB747505	AB747477
GU331377	1655	4793	AB747506	AB747478
GU331369	1656	4795	AB747507	AB747479
GU331367	1657	4797	AB747508	AB747480
GU331365	1658	4799	AB747509	AB747481
GU331357	1659	4801	AB747510	AB747482
GU331363	1660	4803	AB747511	AB747483
GU331361	1661	4805	AB747512	AB747484
GU331359	1662	4807	AB747513	AB747485
GU331352	1663	4809	AB747514	AB747486
JF320191	1664	4811	AB747515	AB747487
HQ385478	1665	4812	AB747516	AB747488
JF320568	1666	4836	AB747517	AB747489
JF320567	1667	4837	AB747518	AB747490
JF320566	1668	4839	AB747519	AB747491
JF320565	1669	4841	AB747520	AB747492
JF320564	1670	4844	AB747521	AB747493
KU685581	1671	4846	AB747522	AB747494
EU786678	1672	4848	AB747523	AB747495
KU685590	1673	4852	AB747524	AB747496
KY112258	1674	4856	AB747525	AB747497
KU685586	1675	4859	AB747526	AB747498
KJ197200	1676	4861	AB747527	AB747499
KU685583	1677	4862	AB747528	AB747500
KY496623	1678	4868	AB747529	AB747501
KT276254	1679	4870	AB747530	AB747502
KU685585	1680	4928	AB747531	AB747503
KT276270	1681	4931	AB747532	AB747504
KT427688	1682	4936	AB747533	AB747505
KT276255	1683	4937	AB747534	AB747506
KT427800	1684	4938	AB747535	AB747507
KT276263	1685	4940	AB747536	AB747508
KT276267	1686	4941	AB747537	AB747509
KT276268	1687	4942	AB747538	AB747512
KT276264	1688	4943	AB747539	AB747513
KT276266	1689	4945	AB747540	AB747514
KT276265	1690	4946	AB747541	AB747515
KT276256	1691	4950	AB747542	AB747516
KT276260	1692	4952	AB747543	AB747517
KT276262	1693	4954	AB747544	AB747518
KT276261	1694	4962	AB747545	AB747519
KT276257	1695	4965	AB747546	AB747520
KT276258	1696	4966	AB747547	AB747521
KT276271	1697	4967	AB747548	AB747522
KT200348	1698	4968	AB747549	AB747523
KY496624	1699	4970	AB751399	AB747524
KJ883151	1700	4976	AB751400	AB747525
EU786672	1701	4980	AB751401	AB747526
KJ883137	1702	4982	AB751402	AB747527
EU786676	1703	4984	AB751403	AB747528
KT200358	1704	4986	AB751404	AB747529
KU685589	1705	4987	AB751405	AB747530
KJ787683	1706	4989	AB751406	AB747531
KT200357	1707	4990	AB751407	AB747532
KU685587	1708	4992	AB751408	AB747533
KJ849780	1709	4994	AB751409	AB747534
KT200350	1710	4997	AB751410	AB747535
KU685584	1711	4998	AB751411	AB747536
KJ197202	1712	4999	AB751412	AB747537
KT427671	1713	5000	AB751413	AB747538
KT427739	1714	5001	AB751414	AB747539
KT427818	1715	5002	AB751415	AB747540
EU884500	1716	5003	AB751416	AB747541
KY658698	1717	5004	AB751417	AB747542
JN882653	1718	5006	AB751418	AB747543
KY514084	1719	5007	AB751419	AB747544
FJ853622	1720	5008	AB751420	AB747545
JF320396	1721	5009	AB751421	AB747546
EF545109	1722	5014	AB751422	AB747547
KJ849813	1723	5015	AB751423	AB747548
JF320408	1724	5016	AB751424	AB747549
KJ197201	1725	5017	AB751425	AB751399
JN692470	1726	5018	AB751426	AB751400
KY658699	1727	5020	AB751427	AB751401
EU884501	1728	5022	AB751428	AB751402
KU685588	1729	5023	AB751429	AB751403
EU786671	1730	5024	AB751430	AB751404
KU685582	1731	5025	AB751431	AB751405
JF932500	1732	5026	AB751432	AB751406
KM248765	1733	5027	AB751433	AB751407
KT276259	1734	5028	AB751434	AB751408
KY112436	1735	5029	AB751435	AB751409
FJ358521	1736	5035	AB751436	AB751410
KT200355	1737	5041	AB751437	AB751411
FJ670526	1738	5042	AB751438	AB751412
KT200356	1739	5044	AB751439	AB751413
KT200351	1740	5045	AB751440	AB751414
KT200354	1741	5047	AB751441	AB751415
KT200353	1742	5048	AB751442	AB751416
KT200349	1743	5049	AB751443	AB751417
KX228812	1744	5051	AB751444	AB751418
KJ883138	1745	5074	AB751445	AB751419
KX228801	1746	5075	AB751446	AB751420
EU786677	1747	5077	AB751447	AB751421
FJ670525	1748	5111	AB751448	AB751422
EU786681	1749	5112	AB751449	AB751423
AY900581	1750	5118	AB751450	AB751424
JX447357	1751	5120	AB751451	AB751425
EU786679	1752	5122	AB751452	AB751426
AY900578	1753	5124	AB751453	AB751427
JX447646	1754	5126	AB751454	AB751428
EU786670	1755	5130	AB751455	AB751429
AY900577	1756	5132	AB751456	AB751430
JX447542	1757	5134	AB751457	AB751431
JX447358	1758	5138	AB751458	AB751432
JX447356	1759	5140	AB751459	AB751433
KT983615	1760	5142	AB751460	AB751434
JF932475	1761	5144	AB751461	AB751435
AY900580	1762	5146	AB751462	AB751436
JF932471	1763	5148	AB751463	AB751437
KY112430	1764	5149	AB751464	AB751438
GU362884	1765	5160	AB751465	AB751439
JF932488	1766	5161	AB751466	AB751440
KY112372	1767	5163	AB751467	AB751441
JF932474	1768	5164	AB751468	AB751442
JX447645	1769	5165	AB751469	AB751443
JX447539	1770	5167	AB751470	AB751444
JX447351	1771	5169	AB751471	AB751445
JX447540	1772	5170	AB751472	AB751446
JX446666	1773	5171	AB751473	AB751447
EU074783	1774	5172	AB751474	AB751448
JF932477	1775	5175	AB751475	AB751449
FJ195086	1776	5177	AB751476	AB751450
JF932497	1777	5179	AB751477	AB751451
KJ849795	1778	5181	AB751478	AB751452
JF932479	1779	5183	AB751479	AB751453
KX232614	1780	5189	AB751480	AB751454
JF932494	1781	5190	AB751481	AB751455
JF320150	1782	5191	AB751482	AB751456
KU749412	1783	5203	AB751483	AB751457
JF932482	1784	5233	AB751484	AB751458
JN692462	1785	5239	AB751485	AB751459
KY112429	1786	5244	AB751486	AB751460
JX447127	1787	5254	AB751487	AB751461
JN692458	1788	5271	AB751488	AB751462
JN692444	1789	5301	AB751489	AB751463
JF320157	1790	5316	AB751490	AB751464
JF320158	1791	5319	AB751491	AB751465
JX112870	1792	5320	AB751492	AB751466
KY658682	1793	5322	AB751493	AB751467
JF932469	1794	5332	AB751494	AB751468
KY514083	1795	5333	AB751495	AB751469
JF932472	1796	5334	AB751496	AB751470
KP718933	1797	5338	AB751497	AB751471
JX447643	1798	5340	AB751498	AB751472
KF250369	1799	5341	AB751499	AB751473
JX447641	1800	5342	AB845344	AB751474
KT427747	1801	5344	AB845345	AB751475
JX112827	1802	5347	AB845346	AB751476
JX447830	1803	5348	AB845347	AB751477
JX447642	1804	5355	AB845348	AB751478
JX447644	1805	5356	AB845349	AB751479
HQ385479	1806	5358	AB845705	AB751480
JX447639	1807	5363	AB845706	AB751481
HQ385477	1808	5370	AB845707	AB751482
JX447349	1809	5378	AB845708	AB751483
EU074782	1810	5381	AB845709	AB751484
JX447638	1811	5382	AB845710	AB751485
DQ167215	1812	5385	AB859012	AB751486
FJ771007	1813	5387	AB863746	AB751487
JX112831	1814	5389	AB863747	AB751488
KY112159	1815	5390	AB863748	AB751489
KT427871	1816	5391	AB863749	AB751490
KY112432	1817	5393	AB863751	AB751491
KX228820	1818	5396	AB863752	AB751492
KY112443	1819	5482	AB863753	AB751493
KX228821	1820	5495	AB863754	AB751494
KY112386	1821	5500	AB863755	AB751495
KX228818	1822	5502	AB863756	AB751496
AY838568	1823	5504	AB863758	AB751497
KX228799	1824	5506	AB863761	AB751498
AY838567	1825	5507	AB863763	AB751499
GQ351296	1826	5508	AB863764	AB845344
DQ093587	1827	5515	AB863765	AB845345
AY838566	1828	5516	AB863766	AB845346
DQ011171	1829	5517	AB863767	AB845347
AY838565	1830	5518	AB863768	AB845348
DQ011180	1831	5520	AB863769	AB845349
DQ011172	1832	5521	AB863770	AB845705
DQ358800	1833	5523	AB863771	AB845706
DQ011173	1834	5525	AB863772	AB845707
DQ011177	1835	5527	AB863773	AB845708
DQ011179	1836	5529	AB863774	AB845709
DQ011178	1837	5532	AB863775	AB845710
DQ011174	1838	5533	AB863782	AB859012
DQ011176	1839	5534	AB863783	AB863746
DQ011175	1840	5535	AB863784	AB863747
DQ011168	1841	5537	AB863785	AB863748
DQ011170	1842	5539	AB863786	AB863749
DQ011169	1843	5542	AB863787	AB863751
DQ011165	1844	5543	AB863788	AB863752
DQ011167	1845	5545	AB863789	AB863753
DQ369995	1846	5547	AB863790	AB863754
DQ369996	1847	5549	AB863791	AB863755
DQ369997	1848	5553	AB863792	AB863756
DQ369998	1849	5554	AB863793	AB863758
DQ369980	1850	5555	AB863794	AB863761
DQ369988	1851	5561	AB863800	AB863763
DQ369992	1852	5563	AB863801	AB863764
DQ369994	1853	5566	AB863802	AB863765
DQ369993	1854	5567	AB863803	AB863766
DQ369989	1855	5581	AB863804	AB863767
DQ369991	1856	5584	AB863806	AB863768
DQ369990	1857	5586	AB863807	AB863769
DQ369981	1858	5589	AB863808	AB863770
DQ369985	1859	5590	AB863809	AB863771
DQ369987	1860	5593	AB863811	AB863772
DQ369986	1861	5595	AB863812	AB863773
DQ369982	1862	5598	AB863813	AB863774
DQ369984	1863	5601	AB863814	AB863775
DQ369983	1864	5603	AB863815	AB863782
DQ369977	1865	5604	AB863816	AB863783
DQ369979	1866	5606	AB863817	AB863784
DQ369978	1867	5611	AB863818	AB863785
DQ369976	1868	5612	AB863883	AB863786
DQ978981	1869	5613	AB863884	AB863787
DQ396393	1870	5614	AB863886	AB863788
DQ396394	1871	5615	AB863887	AB863789
DQ396392	1872	5618	AB863888	AB863790
DQ093588	1873	5619	AB863889	AB863791
DQ396395	1874	5620	AB863890	AB863792
DQ396400	1875	5622	AB863891	AB863793
DQ396396	1876	5623	AB863892	AB863794
DQ396397	1877	5625	AB863893	AB863800
DQ396399	1878	5630	AB863894	AB863801
DQ396398	1879	5631	AB863895	AB863802
DQ093589	1880	5633	AB863896	AB863803
DQ275661	1881	5634	AB863897	AB863804
DQ445635	1882	5636	AB863899	AB863806
DQ396377	1883	5638	AB863900	AB863807
DQ396385	1884	5639	AB863902	AB863808
DQ396389	1885	5641	AB863903	AB863811
DQ396391	1886	5643	AB863904	AB863812
DQ396390	1887	5644	AB863905	AB863813
DQ396386	1888	5645	AB863908	AB863815
DQ396388	1889	5646	AB863910	AB863816
DQ396387	1890	5648	AB863911	AB863817
DQ396378	1891	5662	AB863912	AB863818
DQ396382	1892	5664	AB863914	AB863882
DQ396384	1893	5666	AB863915	AB863884
DQ396383	1894	5667	AB863916	AB863885
DQ396379	1895	5677	AB863917	AB863887
DQ396381	1896	5679	AB863918	AB863888
DQ396380	1897	5683	AB863919	AB863890
DQ445636	1898	5686	AB863920	AB863891
DQ396370	1899	5687	AB863921	AB863892
DQ396374	1900	5688	AB863982	AB863893
DQ396376	1901	5691	AB863983	AB863894
DQ396375	1902	5692	AB863984	AB863895
DQ396371	1903	5694	AB863985	AB863896
DQ396373	1904	5695	AB863986	AB863897
DQ396372	1905	5698	AB863987	AB863899
DQ445637	1906	5699	AB863988	AB863900
DQ396367	1907	5702	AB863989	AB863902
DQ396369	1908	5703	AB863991	AB863903
DQ396368	1909	5766	AB863992	AB863904
DQ396364	1910	5796	AB863993	AB863905
DQ396366	1911	5865	AB863994	AB863906
DQ396365	1912	5866	AB863995	AB863908
DQ275662	1913	5930	AB863996	AB863910
DQ351228	1914	5962	AB863997	AB863911
DQ351236	1915	5967	AB863998	AB863912
DQ445632	1916	5970	AB863999	AB863913
DQ445634	1917	5983	AB864000	AB863914
DQ445633	1918	6009	AB864001	AB863915
DQ351237	1919	6010	AB864002	AB863916
DQ445631	1920	6013	AB864003	AB863917
DQ351238	1921	6014	AB864004	AB863918
DQ351229	1922	6015	AB864006	AB863919
DQ351233	1923	6018	AB864007	AB863920
DQ351235	1924	6019	AB864008	AB863921
DQ351234	1925	6022	AB864009	AB863982
DQ351230	1926	6025	AB864010	AB863983
DQ351232	1927	6030	AB864011	AB863984
DQ351231	1928	6036	AB864012	AB863985
DQ275663	1929	6037	AB864014	AB863986
DQ351221	1930	6048	AB864015	AB863987
DQ351225	1931	6073	AB864016	AB863988
DQ351227	1932	6097	AB864018	AB863989
DQ351226	1933	6106	AB864019	AB863992
DQ351222	1934	6111	AB864020	AB863993
DQ351224	1935	6113	AB864021	AB863994
DQ351223	1936	6115	AB864022	AB863995
DQ275664	1937	6117	AB864023	AB863996
DQ351218	1938	6118	AB864024	AB863997
DQ351220	1939	6119	AB864025	AB863998
DQ351219	1940	6120	AB864026	AB863999
DQ275665	1941	6121	AB864027	AB864000
DQ351217	1942	6122	AB864028	AB864001
DQ351216	1943	6123	AB864029	AB864002
DQ093590	1944	6124	AB864030	AB864003
DQ164118	1945	6126	AB864032	AB864004
DQ275646	1946	6127	AB864033	AB864005
DQ275654	1947	6128	AB864034	AB864006
DQ275658	1948	6134	AB864035	AB864007
DQ275659	1949	6142	AB864036	AB864008
DQ275655	1950	6143	AB864037	AB864009
DQ275657	1951	6147	AB864038	AB864010
DQ275656	1952	6148	AB864039	AB864011
DQ275647	1953	6153	AB864040	AB864012
DQ275651	1954	6154	AB864041	AB864015
DQ275653	1955	6155	AB864042	AB864016
DQ275652	1956	6156	AB864043	AB864018
DQ275648	1957	6158	AB864044	AB864019
DQ275650	1958	6160	AB864045	AB864020
DQ275649	1959	6161	AB864046	AB864021
DQ164119	1960	6162	AB864047	AB864022
DQ164127	1961	6163	AB864048	AB864023
DQ275643	1962	6164	AB864049	AB864024
DQ275645	1963	6165	AB864050	AB864025
DQ275644	1964	6166	AB864051	AB864026
DQ164128	1965	6167	AB864052	AB864027
DQ275642	1966	6168	AB864053	AB864028
DQ164129	1967	6169	AB864054	AB864029
DQ164120	1968	6170	AB864055	AB864030
DQ164124	1969	6171	AB864056	AB864032
DQ164126	1970	6174	AB864057	AB864033
DQ164125	1971	6181	AB864059	AB864034
DQ164121	1972	6182	AB864060	AB864035
DQ164123	1973	6183	AB864061	AB864036
DQ164122	1974	6184	AB864062	AB864037
DQ093591	1975	6185	AB864063	AB864038
DQ093607	1976	6186	AB864064	AB864039
DQ164111	1977	6187	AB864065	AB864040
DQ164115	1978	6188	AB864066	AB864041
DQ164117	1979	6189	AB864067	AB864042
DQ164116	1980	6190	AB864068	AB864043
DQ164112	1981	6191	AB864069	AB864044
DQ164113	1982	6192	AB864070	AB864045
DQ164104	1983	6193	AB864071	AB864046
DQ164108	1984	6194	AB864072	AB864047
DQ164110	1985	6197	AB864073	AB864048
DQ164109	1986	6198	AB864074	AB864049
DQ164105	1987	6201	AB864075	AB864050
DQ164107	1988	6207	AB864076	AB864051
DQ164106	1989	6224	AB864077	AB864052
DQ093592	1990	6230	AB864078	AB864053
DQ093600	1991	6232	AB864079	AB864054
DQ093604	1992	6233	AB864080	AB864055
DQ093606	1993	6241	AB864081	AB864056
DQ093605	1994	6243	AB864082	AB864057
DQ093601	1995	6244	AB864083	AB864059
DQ093603	1996	6246	AB864084	AB864060
DQ093602	1997	6248	AB864085	AB864061
DQ093593	1998	6251	AB864086	AB864062
DQ093597	1999	6253	AB864087	AB864064
[truncated: 105,821 more rows]
